# Supplementary material for: Pharmacists’ Knowledge of Factors Associated with Dementia: The A-to-Z Dementia Knowledge List
Source: MDPI journal article supplement (doi:10.3390/ijerph18199934), 2021-09-22
Supplement: s1 [file s1]

| Questionnaire Questions                                                                    |                    | Choose one of the 4 options* |                              |              |
|--------------------------------------------------------------------------------------------|--------------------|------------------------------|------------------------------|--------------|
| 1. Hearing loss is:                                                                        | <b>Risk Factor</b> | Protective Factor            | Non-Associated Factor        | I don't know |
| 2. Chronic benzodiazepine use is:                                                          | <b>Risk Factor</b> | Protective Factor            | Non-Associated Factor        | I don't know |
| 3. Elevated levels of total cholesterol constitute a:                                      | <b>Risk Factor</b> | Protective Factor            | Non-Associated Factor        | I don't know |
| 4. Listening to music daily is:                                                            | Risk Factor        | Protective Factor            | <b>Non-Associated Factor</b> | I don't know |
| 5. Cognitive stimulation constitutes a:                                                    | Risk Factor        | <b>Protective Factor</b>     | Non-Associated Factor        | I don't know |
| 6. Reading daily constitutes a:                                                            | Risk Factor        | <b>Protective Factor</b>     | Non-Associated Factor        | I don't know |
| 7. Playing a musical instrument is usually:                                                | Risk Factor        | <b>Protective Factor</b>     | Non-Associated Factor        | I don't know |
| 8. Watching television daily is:                                                           | Risk Factor        | Protective Factor            | <b>Non-Associated Factor</b> | I don't know |
| 9. Suffering from depression years before (more than 10) the development of dementia is a: | <b>Risk Factor</b> | Protective Factor            | Non-Associated Factor        | I don't know |
| 10. High levels of physical activity constitute a:                                         | Risk Factor        | <b>Protective Factor</b>     | Non-Associated Factor        | I don't know |
| 11. The use of anticholinergic drugs constitutes a:                                        | <b>Risk Factor</b> | Protective Factor            | Non-Associated Factor        | I don't know |
| 12. Having a family history of some type of dementia is:                                   | <b>Risk Factor</b> | Protective Factor            | Non-Associated Factor        | I don't know |
| 13. Maintaining body hygiene and cleanliness is:                                           | Risk Factor        | Protective Factor            | <b>Non-Associated Factor</b> | I don't know |
| 14. Controlling systolic blood pressure in middle-aged people is:                          | Risk Factor        | <b>Protective Factor</b>     | Non-Associated Factor        | I don't know |
| 15. Brain trauma constitutes a:                                                            | <b>Risk Factor</b> | Protective Factor            | Non-Associated Factor        | I don't know |
| 16. A high adherence to the Mediterranean diet is a:                                       | Risk Factor        | <b>Protective Factor</b>     | Non-Associated Factor        | I don't know |
| 17. Obesity, understood as a body mass index greater than 30 kg/m <sup>2</sup> , is a:     | <b>Risk Factor</b> | Protective Factor            | Non-Associated Factor        | I don't know |
| 18. Jobs with a higher cognitive level constitute a:                                       | Risk Factor        | <b>Protective Factor</b>     | Non-Associated Factor        | I don't know |
| 19. To be an only child is:                                                                | Risk Factor        | Protective Factor            | <b>Non-Associated Factor</b> | I don't know |
| 20. Social isolation is a:                                                                 | <b>Risk Factor</b> | Protective Factor            | Non-Associated Factor        | I don't know |
| 21. Memory complaints constitute a:                                                        | <b>Risk Factor</b> | Protective Factor            | Non-Associated Factor        | I don't know |
| 22. A high level of education constitutes a:                                               | Risk Factor        | <b>Protective Factor</b>     | Non-Associated Factor        | I don't know |
| 23. Metabolic syndrome is a:                                                               | <b>Risk Factor</b> | Protective Factor            | Non-Associated Factor        | I don't know |
| 24. Tobacco use constitutes a:                                                             | <b>Risk Factor</b> | Protective Factor            | Non-Associated Factor        | I don't know |

|                                                                                                                          |                    |                          |                              |              |
|--------------------------------------------------------------------------------------------------------------------------|--------------------|--------------------------|------------------------------|--------------|
| 25. Occupational therapy in the elderly population is a:                                                                 | Risk Factor        | <b>Protective Factor</b> | Non-Associated Factor        | I don't know |
| 26. Being prone to cold sores is:                                                                                        | <b>Risk Factor</b> | Protective Factor        | Non-Associated Factor        | I don't know |
| 27. Using the internet or social networks from any technological device is:                                              | Risk Factor        | <b>Protective Factor</b> | Non-Associated Factor        | I don't know |
| 28. Manual work is:                                                                                                      | Risk Factor        | Protective Factor        | <b>Non-Associated Factor</b> | I don't know |
| 29. Being a woman constitutes a:                                                                                         | <b>Risk Factor</b> | Protective Factor        | Non-Associated Factor        | I don't know |
| 30. That people acquire a proactive attitude of prevention regarding the modifiable factors associated with dementia is: | Risk Factor        | <b>Protective Factor</b> | Non-Associated Factor        | I don't know |
| 31. Sleeping less than 6 h a day:                                                                                        | <b>Risk Factor</b> | Protective Factor        | Non-Associated Factor        | I don't know |
| 32. Sleeping more than 9 h a day:                                                                                        | <b>Risk Factor</b> | Protective Factor        | Non-Associated Factor        | I don't know |
| 33. Refraining from drinking alcohol is:                                                                                 | Risk Factor        | <b>Protective Factor</b> | Non-Associated Factor        | I don't know |
| 34. Living in the countryside or in rural areas is:                                                                      | Risk Factor        | <b>Protective Factor</b> | Non-Associated Factor        | I don't know |
| 35. Taking anti-inflammatory drugs and/or having inflammatory diseases under control is:                                 | Risk Factor        | <b>Protective Factor</b> | Non-Associated Factor        | I don't know |
| 36. Speaking several languages is:                                                                                       | Risk Factor        | <b>Protective Factor</b> | Non-Associated Factor        | I don't know |

\* Correct answer in bold.
